# Supplementary material for: Hot spots, hot moments, and spatiotemporal drivers of soil CO 2 flux in temperate peatlands using UAV remote sensing
Source: Copernicus journal article supplement (doi:10.5194/egusphere-2025-1595), 2025-05-15
Supplement: Supplementary file [file egusphere-2025-1595-RC1-supplement.pdf]

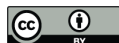

1     **Hot spots, hot moments, and spatiotemporal drivers of soil**  
2     **CO<sub>2</sub> flux in temperate peatlands using UAV remote sensing**

3     **Yanfei Li<sup>1\*</sup>, Maud Henrion<sup>1</sup>, Angus Moore<sup>1</sup>, Sébastien Lambot<sup>1</sup>, Sophie**  
4     **Opfergelt<sup>1</sup>, Veerle Vanacker<sup>1</sup>, François Jonard<sup>2†</sup>, Kristof Van Oost<sup>1†</sup>**

5     <sup>1</sup> Earth and Life Institute, Université catholique de Louvain, 1348 Louvain-la-Neuve, Belgium.

6     <sup>2</sup> Earth Observation and Ecosystem Modelling Laboratory, SPHERES Research Unit, Université de  
7     Liège, 4000 Liège, Belgium.

8     \*Correspondence to: Yanfei Li (email: [yanfei.li@uclouvain.be](mailto:yanfei.li@uclouvain.be)).

9     <sup>†</sup> These authors are co-last authors.

10

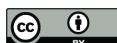

11 **Abstract**

12 CO<sub>2</sub> emissions from peatlands exhibit substantial spatial temporal variability due to their  
13 heterogeneous nature, presenting challenges to identify their underlying drivers and to accurately  
14 quantify and model CO<sub>2</sub> fluxes. Here, we integrated field measurements with Unmanned Aerial Vehicle  
15 (UAV)-based multi-sensor remote sensing to investigate soil respiration across a temperate peatland  
16 landscape. Our research addressed two key questions: (1) How do environmental factors control the  
17 spatial-temporal distribution of soil respiration across complex landscapes? (2) How do hot spots and hot  
18 moments of biogeochemical processes influence landscape-level CO<sub>2</sub> fluxes? We find that dynamic  
19 variables (i.e., soil temperature and moisture) play significant roles in shaping CO<sub>2</sub> flux variations,  
20 contributing 43 % to seasonal variability and 29 % to spatial variance, followed by semi-dynamic  
21 variables (i.e., NDVI and root biomass) (19 % and 24 %). Relatively static variables (i.e., soil organic  
22 carbon (SOC) stock and C/N ratio) have a minimal influence on seasonal variation (2 %) but contribute  
23 more to spatial variance (10 %). Additionally, predicting time series of CO<sub>2</sub> fluxes is feasible by using  
24 key environmental variables (test set:  $R^2 = 0.74$ ,  $RMSE = 0.57 \mu\text{mol m}^{-2} \text{s}^{-1}$ ), while UAV remote sensing  
25 is an effective tool for mapping daily soil respiration (test set:  $R^2 = 0.75$ ,  $RMSE = 0.54 \mu\text{mol m}^{-2} \text{s}^{-1}$ ). By  
26 the integration of in-situ high-resolution time-lapse monitoring and spatial mapping, we find that despite  
27 occurring in 10 % of the year, hot moments contribute 28 %–31 % of the annual CO<sub>2</sub> fluxes. Meanwhile,  
28 hot spots—representing 10 % of the area—account for 20 % of CO<sub>2</sub> fluxes across the landscape. Our  
29 study demonstrates that integrating UAV-based remote sensing with field surveys improves the  
30 understanding of soil respiration mechanisms across timescales in complex landscapes, providing  
31 insights into carbon dynamics and supporting peatland conservation and climate change mitigation  
32 efforts.

33 **Keywords:** Peatlands, Soil respiration, Greenhouse gas (CO<sub>2</sub>) emission, CO<sub>2</sub> hot spots, CO<sub>2</sub> hot  
34 moments, Multi-sensor UAV remote sensing, Global warming

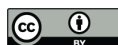

## 35 **1 Introduction**

36 Peatlands are globally distributed ecosystems that store approximately 600 Gt of carbon (Yu et al., 2010),  
37 despite covering less than 4 % of the Earth's land surface (Xu et al., 2018). However, rising concerns  
38 exist over peatlands shifting from carbon sinks to carbon sources due to the impact of climate change  
39 (Dorrepaal et al., 2009; Huang et al., 2021; Hopple et al., 2020), land use/cover conversion (Leifeld et  
40 al., 2019; Deshmukh et al., 2021; Prananto et al., 2020), and other disturbances (Wilkinson et al., 2023;  
41 Turetsky et al., 2015). In Europe, it has been reported that nearly half of the peatlands are suffering  
42 degradation, primarily due to drainage for agricultural or forestry activities (Leifeld et al., 2019; Unep,  
43 2022). As a consequence, European peatlands currently emit up to 580 Mt CO<sub>2</sub>-eq per year across the  
44 continent (Unep, 2022). Given the critical role of the peatland ecosystem in the terrestrial carbon cycle,  
45 it is therefore important to understand the mechanisms driving carbon fluxes and their responses to  
46 climate change and human disturbances.

47 Soil respiration in peatlands is influenced by a combination of biotic and abiotic factors, such as soil  
48 temperature and moisture (Treat et al., 2014; Fang and Moncrieff, 2001; Juszczak et al., 2013; Swails et  
49 al., 2022; Hoyt et al., 2019; Evans et al., 2021), vegetation and root biomass (Acosta et al., 2017; Wang  
50 et al., 2021), and soil organic matter quality (Hoyos-Santillan et al., 2016; L  et al., 2012). CO<sub>2</sub>  
51 emissions from peatlands are highly variable over space and time, presenting challenges to accurately  
52 quantify and model carbon fluxes. This may partial because peatlands are characterized by a unique  
53 microtopography, including features such as soil  and depressions (Moore et al., 2019). These  
54 small-scale variations create differences in hydrology, temperature, biogeochemistry, and vegetation  
55 (Harris and Baird, 2019), leading to substantial spatial differences in the factors that control CO<sub>2</sub> fluxes  
56 and the formation of hot spots with elevated CO<sub>2</sub> emissions (Kelly et al., 2021; Becker et al., 2008;  
57 Mcclain et al., 2003; Frei et al., 2012; Kim and Verma, 1992). For instance, the peat surface temperature  
58 differences within a 10 m x 10 m plot characterized by hummock and hollow features can be 20°C  
59 (Rhoswen et al., 2018). In addition, peatlands experience highly variable weather conditions, which can  
60 trigger periods of disproportionately high CO<sub>2</sub> fluxes—often referred to as 'hot moments'—in response  
61 to transient environmental changes, such as sudden shifts in temperature, rainfall events, or fluctuations  
62 in the water table (Anthony and Silver, 2023). High CO<sub>2</sub> emissions  occur from discrete areas in space  
63 (hot spots) and over short periods (hot moments), and may disproportionately contribute to the overall

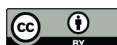

64 fluxes (Anthony and Silver, 2023; Fernandez-Bou et al., 2020). Most studies have examined the  
65 mechanisms and contributions of hot spots and hot moments of other greenhouse gases ( $N_2O$ ,  $CH_4$ ) in  
66 agricultural and forestry ecosystems (Krichels and Yang, 2019; Anthony and Silver, 2021; Kannenberg  
67 et al., 2020; Leon et al., 2014; Fernandez-Bou et al., 2020), while research on  $CO_2$  emission hot spots  
68 and hot moments in peatlands remains limited (Anthony and Silver, 2021, 2023).

69 Identifying and quantifying hot spots and hot moments in peatlands is challenging, requiring large-scale,  
70 continuous, long-term observations. Currently, most studies on peatland soil respiration rely on point  
71 measurements taken at intervals of half a month to one month, primarily during daytime (e.g., Wright et  
72 al. (2013); Bubier et al. (2003); Kim and Verma (1992); Danevčič et al. (2010)). This spatial and temporal  
73 limitation hinders the effective detection of hot spots and hot moments. Some studies attempted to  
74 extrapolate point data using land-use maps (Van Giersbergen et al., 2024; Webster et al., 2008; Mcnamara  
75 et al., 2008), but uncertainties in landscape-scale fluxes increase as the number of measurement locations  
76 decreases (Arias-Navarro et al., 2017; Wangari et al., 2022; Wangari et al., 2023). While automated  
77 chamber systems improve temporal resolution and help capture hot moments (Hoyt et al., 2019; Anthony  
78 and Silver, 2023), they are typically limited to a few sampling points, and scaling up is constrained by  
79 significant resource demands. Eddy covariance towers measure net ecosystem exchange over large areas  
80 by recording high-frequency  $CO_2$  concentrations and air turbulence, providing insights into temporal  
81 variations at the ecosystem level (Rey-Sanchez et al., 2022; Abdalla et al., 2014). However, the  
82 underlying controlling factors and mechanisms at the process level are difficult to infer due to the large  
83 spatial footprint. In addition, they may not accurately represent the spatial heterogeneity of peatlands  
84 (Lees et al., 2018). These limitations highlight the need for complementary approaches to estimate  $CO_2$   
85 fluxes at the landscape scale with methods adapted for heterogeneous peatland ecosystems.

86 Several studies have integrated satellite-based remote sensing datasets with on-site chamber  
87 measurements to model landscape-scale  $CO_2$  fluxes (e.g., Junttila et al. (2021); Wangari et al. (2023);  
88 Lees et al. (2018); Azevedo et al. (2021)). Remote sensing datasets on topography and vegetation  
89 parameters serve as proxies for soil moisture, vegetation cover, and nutrient availability, enabling large-  
90 scale  $CO_2$  emission estimates within peatlands (Lees et al., 2018). However, this approach is somewhat  
91 limited by coarse spatial (10 m to 1 km) and temporal (1 to 16 days) resolutions, which may overlook



92 hot spots and hot moments, leading to potential over- or underestimations of CO<sub>2</sub> fluxes in heterogeneous  
93 peatlands (Kelly et al., 2021; Simpson, 2023). This shortcoming might be overcome by using unmanned  
94 aerial vehicles (UAVs) equipped with different kinds of sensors such as Red-Green-Blue (RGB),  
95 multispectral, thermal infrared, and Light Detection and Ranging (LiDAR). UAVs offer flexible  
96 deployment and capture high-resolution spatiotemporal data (1 cm to 1 m, minutes to months) (Minasny  
97 et al., 2019) which makes them particularly suitable for monitoring complex peatland dynamics and  
98 detecting hot spots and hot moments. Thus far, UAVs have proven to be reliable tools for peatland  
99 applications, including vegetation mapping (Steenvoorden et al., 2023), topographic reconstruction  
100 (Harris and Baird, 2019) at depth and carbon storage estimation (Li et al., 2024), and moisture  
101 monitoring (Henrion et al., 2025). In a recent study, Kelly et al. (2021) utilized UAV-derived land surface  
102 temperature to estimate ecosystem respiration of a hemi-boreal fen in southern Sweden, and Pajula and  
103 Purre (2021) and Walcker et al. (2025) employed UAV-based multispectral vegetation indices to map  
104 ecosystem CO<sub>2</sub> flux at high resolution. These recent studies demonstrated the great potential of UAVs  
105 for linking CO<sub>2</sub> fluxes with environmental factors at a very high resolution, although they mainly focused  
106 on data from a single sensor. Few studies have explored the fusion of UAV-derived data from multiple  
107 sensors for mapping soil respiration across peatland landscapes.

108 In this study, we integrate multi-sensor UAV-based remote sensing with traditional field surveys to  
109 investigate soil respiration across a temperate peatland landscape, located in the Belgian Hautes Fagnes.  
110 As one of the largest and most ancient peatlands in Western Europe, the Belgian Hautes Fagnes represents  
111 an important ecosystem for studying peatland carbon fluxes due to its sensitivity to climate change and  
112 hydrological dynamics. Our research addresses two key questions: (1) What controls the nature and  
113 strength of the relationship between soil respiration and environmental factors across complex peatland  
114 landscapes and across spatial-temporal scales? (2) How do hot spots or hot moments of biogeochemical  
115 processes influence landscape-level carbon fluxes? More specifically, our study has three main objectives.  
116 First, we aim to identify the factors driving seasonal and spatial variations in soil respiration. Second, we  
117 assess the potential for linking environmental factors to CO<sub>2</sub> flux at high spatial and temporal resolutions.  
118 Third, we discuss the timing and location of hotspots and hot moments, assessing their contributions to  
119 overall CO<sub>2</sub> flux budgets.

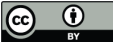

120    **2 Materials and methods**

121    **2.1 Study site**

122    The Belgian Hautes Fagnes plateau, part of the Stavelot-Venn Massif, is located in eastern Belgium  
123    (Figure 1a). This elevated landscape experiences a humid climate, with mean annual air temperature and  
124    precipitation being approximately 6.7 °C and 1439.4 mm (period: 1971-2000), respectively (Mormal and  
125    Tricot, 2004). The peatlands in this region cover an area of 37.50 km<sup>2</sup>, which primarily consist of raised  
126    bogs formed since the Late Pleistocene (Frankard et al., 1998). Our study site (50.49° N, 6.05° E; ~0.30  
127    km<sup>2</sup>) is located in the upper valley of the Hoëgne River peatland region (Figure 1a). The site is  
128    characterized by a distinct SE-NW oriented topographic gradient, with a clear transition from a low-relief  
129    plateau to steep hillslopes and then to the floodplain of a broad river valley (Sougneux and Vanacker,  
130    2011). The area was drained and planted with spruces in 1914 and 1918. The plantations were  
131    progressively cleared between 2000 and 2016; since 2017, the site has been restored through reforestation  
132    with native hardwood species such as *Betula pubescens* and *Quercus robur*. Figure 1b shows main  
133    vegetation types across this landscape. An observation station of the Royal Meteorological Institute of  
134    Belgium (Mont Rigi, 50.51° N, 6.07° E) situated 3.0 km from the study site, records rainfall data every  
135    10 minutes.

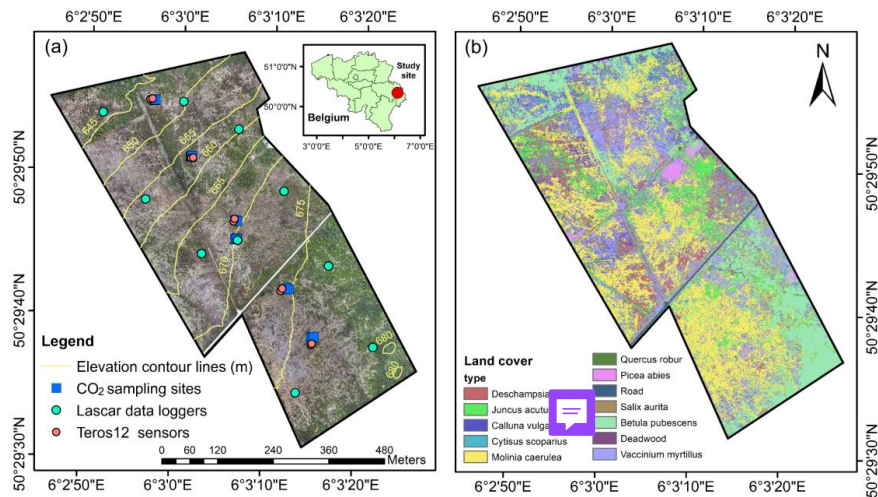

136  
137    **Figure 1.** Maps showing the field-sampling locations (a) and land cover types (b) in the study area. Details on the  
138    land cover map are provided in our previous work (Li et al., 2024).

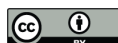

## 139 2.2 CO<sub>2</sub> flux measurement campaigns

140 Soil surface CO<sub>2</sub> flux measurements were conducted at five slope positions along the middle part of the  
141 site (Figure 1a). A portable infrared gas analyzer with an automated closed dynamic chamber (LI-8100A  
142 system, LI-COR, United States) was used to monitor CO<sub>2</sub> fluxes at 33 sites biweekly from December  
143 2022 to March 2024 (Figure S1). At each slope position, six collars (20 cm diameter) were installed  
144 randomly, spaced 1–5 meters apart, to capture small-scale spatial variability. While at the boulder,  
145 considering the heterogeneous soil water conditions, six collars were installed in drier areas and another  
146 three in wetter areas. All vegetation within the collars was removed. During each campaign, monitoring  
147 was conducted between 9:00 and 16:00. At each site, the CO<sub>2</sub> flux ( $\mu\text{mol m}^{-2} \text{s}^{-1}$ ) in the chamber was  
148 measured for 2.5 minutes per observation. Simultaneously, soil surface temperature (0–10 cm) and  
149 volumetric water content (VWC) during each CO<sub>2</sub> measurement were recorded using a T-handled type-  
150 E thermocouple sensor (8100-201, LI-COR, United States) and a portable five-rod, 0.06 m long  
151 frequency domain reflectometry (FDR) probe system (ML2x, Delta-T, United Kingdom), respectively.  
152 However, CO<sub>2</sub> measurements were not always possible due to technical issues and bad weather  
153 conditions, resulting in a total of 666 valid measurements. In addition, a pair of soil CO<sub>2</sub> forced diffusion  
154 probes (eosFD, EOSense, United States) were installed near LI-8100A collars from 24 April 2024 to 8  
155 November 2024 (Figure S1). These probes, consisting of a soil node and a reference node, are based on  
156 a membrane-based steady-state approach and can measure CO<sub>2</sub> flux every 5 minutes (Risk et al., 2011).  
157 During this period, the probes continuously monitored CO<sub>2</sub> flux at different slope positions (Figure S1),  
158 resulting in a total of 39476 valid flux measurements.

## 159 2.3 Temperature and soil moisture monitoring

160 The temporal evolution of soil temperature and moisture along the middle part was monitored using  
161 Teros12 sensors (Meter Group, München, Germany), with two replicates per slope position, spaced 5  
162 meters apart (Figure 1a) (Henrion et al., 2025). These sensors recorded data at a depth of 10 cm from 14  
163 October 2022 to 28 October 2024, every 10 minutes. Between the two replicates of each slope position,  
164 a station positioned ~1.4 m above the ground recorded air temperature every ten minutes. Additionally,  
165 ten soil temperature data loggers (EL-USB-1-PRO, Lascar, United Kingdom) were installed primarily  
166 along two evenly spaced transects parallel to the main slope, at a depth of 10 cm (Figure 1a). These



167 loggers recorded soil temperatures at the same frequency as Teros12 sensors from 21 March 2023 to 8  
168 November 2024.

#### 169 **2.4 Soil sampling and laboratory analysis**

170 After completing all gas sampling campaigns, 33 disturbed soil samples (0-10 cm depth) were collected  
171 within LI8100A collars at the five slope positions between 30 July and 15 October 2024. An Emlid Reach  
172 RS 2 GPS device with centimeter-level precision was used to record the sampling site locations, using a  
173 PPK solution with the Belgian WALCORS network. The samples were stored in a refrigerator until  
174 laboratory analysis. A subset of the samples was oven-dried at 80 °C for 24 hours (Dettmann et al., 2021),  
175 then crushed and ground into a fine powder for soil organic carbon (SOC) and total nitrogen content (TN)  
176 analysis (928 Series, LEGO, United States). Roots and litter were removed using tweezers during the  
177 pre-processing procedure. We tested the presence of inorganic carbon of each sample by adding one drop  
178 of 10 % HCl but found that no inorganic carbon was present in the samples. A subset of fresh samples  
179 was used for root biomass analysis. The fresh soil samples were weighed and placed in a 1 mm sieve,  
180 then rinsed with water to collect the roots. The washed roots were dried in an oven at 80 °C for 48 hours  
181 and then weighed to calculate their dry biomass.

#### 182 **2.5 UAV data acquisition and imagery processing**

183 During the CO<sub>2</sub> flux monitoring period, we conducted regular UAV flights across the study area to collect  
184 high-resolution spatial data (Figure S1). A DJI Matrice 300 RTK was equipped with four different sensors:  
185 (i) a Red-Green-Blue (RGB) camera (DJI Zenmuse P1 camera, 35 mm and 45 MP), (ii) a multispectral  
186 camera (MicaSense RedEdge-M camera with five discrete spectral bands: blue (475 nm), green (560 nm),  
187 red (668 nm), rededge (717 nm), and near-infrared (842 nm), along with a downwelling light sensor),  
188 (iii) a LiDAR scanner (DJI Zenmuse L1, integrated with a 20-MP camera with a 1-inch CMOS sensor)  
189 and (iv) a thermal infrared camera (TeAX, featuring FLIR Tau2 cores and ThermalCapture hardware).  
190 Similar flight patterns and altitudes were used for the UAV missions as in our previous work (Li et al.,  
191 2024). In total, one RGB and one LiDAR dataset collected on 7 June 2023, were used in this study and  
192 ten multispectral and ten thermal datasets collected between 13 April 2023 and 13 May 2024.

193 The raw multispectral images were processed in the Pix4D mapper software (Pix4D S.A., Lausanne,





194 Switzerland) to generate reflectance maps (resolution: 6 cm) of the five spectral bands of the study area.  
195 We calculated the Normalized Difference Vegetation Index (NDVI) across the 10 maps from the  
196 monitoring period (Table S1). The raw thermal infrared video streams were converted into RJPG images  
197 using ThermoViewer version 3.0.26 (TeAX, 2022). Subsequently, the thermal images were processed  
198 with the Pix4D mapper to generate land surface temperature (LST) maps (resolution: 12 cm), which were  
199 used for soil temperature maps (Text S1, Figure S2, Table S2). The RGB photos were processed in  
200 DJI Terra V4.0.10 (DJI, 2023) to generate an orthomosaic image with a resolution of 1.26 cm. The raw  
201 LiDAR data was processed in DJI Terra to provide a Digital Terrain Model (DTM; .tif file) with a  
202 resolution of 15 cm, which was used for generating daily air temperature maps (Text S1) and terrain  
203 wetness index (TWI) (Text S2). The variables derived from the four types of images were summarized  
204 in Table S1.

## 205 2.6 Statistical analysis

206 All data analyses were conducted in RStudio (v4.1.2). All timestamps in this study were converted to  
207 Coordinated Universal Time (UTC) to ensure consistency across datasets. Group differences were  
208 assessed by the one-way analysis of variance (*ANOVA*) using the *stats* package. When *ANOVA* detected  
209 a significant effect ( $p < 0.05$ ), Tukey's Honestly Significant Difference (*HSD*) post-hoc test was  
210 performed to determine which groups differed significantly from each other. Pearson correlation analysis  
211 was performed using the *corrplot* package (Murdoch and Chow, 1996). The linear mixed-effects models  
212 used to identify factors controlling spatial-temporal variations of CO<sub>2</sub> flux, as well as time series  
213 simulation and mapping are introduced below.

### 214 2.6.1 Models to explain spatial-temporal variations in CO<sub>2</sub> flux

215 We utilized linear mixed-effects models to assess the impacts of both static and dynamic environmental  
216 factors on the spatial and seasonal variability of CO<sub>2</sub> fluxes. This is because mixed models integrate both  
217 fixed and random effects, which provide a robust framework for analyzing data with non-independent  
218 structures (Pinheiro and Bates, 2000). The model was performed using the *lme4* package (Bates et al.,  
219 2015), with the natural logarithm of CO<sub>2</sub> flux observations as a response. The CO<sub>2</sub> fluxes data are often  
220 characterized by extreme values and right-skewed distribution, and a lognormal assumption for CO<sub>2</sub>

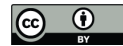

221 fluxes could better account for the influences of extreme values on the overall distribution (Wutzler et  
222 al., 2020). The mixed-effects models were defined as:

$$223 \quad y_{ij} = \beta_0 + \beta_1 x_{ij} + \dots + \beta_p x_{ij} + b_{0j} + b_{1j} z_{ij} + \dots + \epsilon_{ij} \quad (1)$$

224 Where:

- 225 •  $y_{ij}$  is the dependent variable (i.e.,  $\ln(\text{CO}_2 \text{ flux})$ , unit:  $\mu\text{mol m}^{-2} \text{s}^{-1}$ ) for observations  $i$  in group
- 226  $j$ .
- 227 •  $\beta_0, \beta_1, \dots, \beta_p$  are fixed-effect coefficients.
- 228 •  $x_{ij}$  is the fixed-effect variable (independent variable).
- 229 •  $b_{0j}, b_{1j}, \dots$  are random-effect coefficients associated with group  $j$ , which account for
- 230 variability across groups.
- 231 •  $z_{ij}$  is the random-effect variable.
- 232 •  $\epsilon_{ij}$  is the residual error term.

233 The fixed-effect predictors were categorized into three groups:

- 234 • Static variables: SOC stock, and the ratio of SOC content to nitrogen content (C/N ratio).
- 235 • Semi-dynamic variables: root biomass and NDVI.
- 236 • Dynamic variables: soil temperature and soil moisture at 0–10 cm depth.

237 Estimates for NDVI were extracted from the ps by retrieving the value of the 33 CO<sub>2</sub> flux observation  
238 sites and the SOC stock values were extracted from the a local high resolution (0.15 m) SOC stock map  
239 (Li et al., 2024). The sites were included as random effects in the seasonal pattern model to account for  
240 repeated measurements at the same locations during the monitoring period, whereas slope positions were  
241 treated as random effects in the spatial pattern model. Independent variable coefficients, Intraclass  
242 Correlation Coefficient (*ICC*), coefficients of determination (*marginal R<sup>2</sup>* and *conditional R<sup>2</sup>*), Root Mean  
243 Square Error (*RMSE*), and Akaike Information Criterion (*AIC*) were extracted using the *modelssummary*  
244 *package* after running each  model. The *ICC* quantifies the proportion of variance explained by a grouping  
245 (random) factor in multilevel data; values close to 1 indicate high similarity within groups, while values  
246 near 0 suggest that grouping conveys little to no information (Nakagawa et al., 2017; Shrout and Fleiss,  
247 1979). The *marginal R<sup>2</sup>*, represents the variance explained by fixed effects alone, and *conditional R<sup>2</sup>*  
248 represents the variance explained by both fixed and random effects (Pinheiro and Bates, 2000). The



relative importance of each independent variable was obtained using the *glmm.hp* package. To assess multicollinearity in regression analysis, the *car package* was used to calculate the variance inflation factor (*VIF*) (Fox and Monette, 1992).

### 2.6.2 Modelling hourly CO<sub>2</sub> flux

The mixed-effects model was utilized to simulate the time series of CO<sub>2</sub> fluxes at different slope positions. Here, the slope position was included as random variable, and the natural logarithm of CO<sub>2</sub> flux (hourly) was set as a response. We utilized CO<sub>2</sub> fluxes data measured by both the LI8100A system and eosFD probes. Specifically, we randomly selected a number of 30 observations from the eosFD probes at each slope position to reduce data redundancy from high-frequency sampling. Afterwards, we applied weighting to adjust the remaining imbalance in data density between the high-frequency eosFD monitoring and low-frequency LI8100A measurements, ensuring both data sources contributed proportionally to the model. The independent variables included hourly soil temperature (10 cm depth), volumetric soil moisture (VWC, 10 cm depth), and air temperature (1.4 m height), considering their importance in explaining the seasonal and diurnal patterns of CO<sub>2</sub> flux.

As in our previous work (Li et al., 2024), we divided the dataset into a training set (70 %) and a test set (30 %) using K-means clustering to minimize biases that could arise from random sampling (Hair et al., 2010). The models were trained on the training set, and the simulation accuracy was validated using the test dataset. The coefficient of determination ( $R^2$ ) and *RMSE* were used to assess the quality of the model fit. Finally, we made simulations of the time series of hourly CO<sub>2</sub> flux for different slope positions from 1 May 2023 to 30 April 2024. Furthermore, we identified CO<sub>2</sub> emission hot moments based on the description in Section 2.6.4.

### 2.6.3 Mapping daily CO<sub>2</sub> flux

The linear mixed-effects model was utilized to map the spatial distribution of daily CO<sub>2</sub> fluxes across the landscape, with daily soil temperature (10 cm depth), corrected daily TWI, and SOC stock being considered as fixed-effect variables and gas sampling sites being included as random variables. The daily CO<sub>2</sub> flux model training, testing procedures, and evaluation of model fit followed the same approach detailed in Section 2.6.2. We then applied the trained model to predict the daily CO<sub>2</sub> flux of the landscape

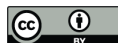

276 from 1 May 2023 to 30 April 2024. Additionally, we calculated the mean daily soil CO<sub>2</sub> flux maps for  
277 each season and the entire year. Based on these predictions, we identified hot spots for each day by the  
278 methods described below.

#### 279 **2.6.4 Quantifying hot moments and hot spots of CO<sub>2</sub> flux**

280 In previous studies, percentiles have been used as thresholds for identifying heat waves (e.g., (Meehl and  
281 Tebaldi, 2004): 97.5th percentile), soil heat extremes (e.g., García-García et al. (2023): 90th percentile),  
282 hot spots of N<sub>2</sub>O emissions (e.g., Mason et al. (2017): median plus three times the interquartile range),  
283 and hot spots of CO<sub>2</sub> emissions (e.g., Wangari et al. (2023): median plus the interquartile range). In this  
284 study, we tested different methods and selected the 90th percentile as the threshold of both hot moments  
285 and hot spots to balance capturing extreme CO<sub>2</sub> emissions while maintaining a sufficient sample size. To  
286 capture the hot moments, we calculated a threshold for each slope position separately using its own  
287 dataset. For hot spots, we determined a daily threshold based on each map.

288



289    **3 Results**

290    **3.1 Spatial and temporal patterns of CO<sub>2</sub> flux**

291    During the monitoring period, the CO<sub>2</sub> emissions show large spatial and seasonal variations across the  
292    landscape. The CO<sub>2</sub> fluxes at the summit ( $3.16 \pm 3.25 \mu\text{mol m}^{-2} \text{s}^{-1}$ ) and shoulder (dry:  $2.81 \pm 3.22 \mu\text{mol}$   
293     $\text{m}^{-2} \text{s}^{-1}$ , wet:  $2.33 \pm 2.36 \mu\text{mol m}^{-2} \text{s}^{-1}$ ) slope positions were significantly higher than that of footslope  
294    ( $1.25 \pm 1.00 \mu\text{mol m}^{-2} \text{s}^{-1}$ ) and backslope ( $1.11 \pm 1.03 \mu\text{mol m}^{-2} \text{s}^{-1}$ ) ( $p < 0.05$ ) (Figure 2a). Furthermore,  
295    significant differences were observed when grouping the data into three vegetation covers: CO<sub>2</sub>  
296    emissions from *Vaccinium myrtillus* were lower than those from *Juncus acutus*, with mean  $\pm$  sd values  
297    of  $1.59 \pm 1.43 \mu\text{mol m}^{-2} \text{s}^{-1}$ , and  $2.33 \pm 2.36 \mu\text{mol m}^{-2} \text{s}^{-1}$ , respectively (Figure 2b) ( $p < 0.05$ ). However,  
298    the CO<sub>2</sub> fluxes under *Molinia caerulea* displayed large variations ( $0.02\sim 20.1 \mu\text{mol m}^{-2} \text{s}^{-1}$ ), and no  
299    significant differences were found compared to the other two vegetation types. The CO<sub>2</sub> flux data  
300    indicated large CO<sub>2</sub> emissions from June to September ( $3.65 \pm 2.68 \mu\text{mol m}^{-2} \text{s}^{-1}$ ), which can be 8.11  
301    times higher than that from winter and early spring ( $0.45 \pm 0.40 \mu\text{mol m}^{-2} \text{s}^{-1}$ ) (Figure 2c). CO<sub>2</sub> emissions  
302    in May and October were at a moderate level.

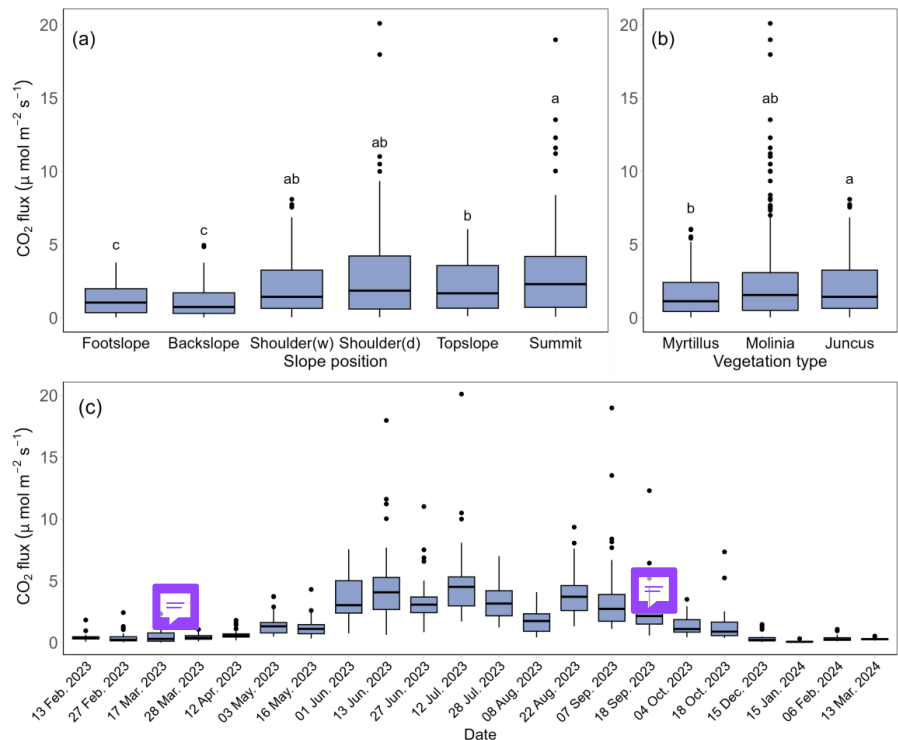

**Figure 2.** Boxplot of CO<sub>2</sub> flux (μmol m<sup>-2</sup> s<sup>-1</sup>) across different slope positions (a), vegetation types (b), and sampling dates (c), using data from the LI8100 A system recorded between 2023-02-13 and 2024-03-13. (a), CO<sub>2</sub> flux data of each box were from all dates, and Shoulder (w) and Shoulder (d) indicate shoulder wet and shoulder dry areas, respectively. (b), CO<sub>2</sub> flux data of each box were from all dates, and Myrtillus, Molinia and Juncus indicate *Vaccinium myrtillus*, *Molinia caerulea* and *Juncus acutus*, respectively. (c), CO<sub>2</sub> flux data of each box were from all slope positions. The edges of each box represent the first quartile (Q1) and third quartile (Q3), while the line inside the box indicates the median CO<sub>2</sub> flux. Whiskers extend from the box to the smallest and largest values within 1.5 times the interquartile range, and points outside the whiskers are considered extreme values. The *ANOVA* and *HSD* post-hoc tests were performed within slope positions and vegetation types, with boxes sharing the same letters indicating no significant difference.

### 3.2 Factors contributing to spatial-temporal variability

Three types of environmental factors explain 64 % of the observed seasonal variance in CO<sub>2</sub> emissions, with contributions of 33 % from soil temperature, 10 % from VWC, 19 % from vegetation (i.e., NDVI,



317 root biomass), 2 % from relatively static factors (i.e., SOC stock, C/N ratio), and 6 % from random effects  
318 (i.e., 33 sampling sites) (Table 1). This suggests that long-term stable environmental factors have minimal  
319 direct influence on seasonal CO<sub>2</sub> flux patterns. Interestingly, the contribution of these relatively stable  
320 factors is nearly 11 times higher in explaining overall spatial variations, although soil temperature is still  
321 the dominant factor (Table 1). The low *ICC* values in both spatial and seasonal models highlight  
322 significant small-scale heterogeneity in soil respiration.

323 **Table 1.** Coefficients and relative contributions of three types of input variables (static, semi-dynamic, dynamic) of  
324 mixed linear regression models for modelling CO<sub>2</sub> flux. Random effects were evaluated by *ICC* and model  
325 performance was evaluated by *Marginal R<sup>2</sup>*, *Conditional R<sup>2</sup>*, and *RMSE*.

| Input variables                                 |                                  |                                            | Seasonal patterns  | Spatial patterns   |
|-------------------------------------------------|----------------------------------|--------------------------------------------|--------------------|--------------------|
| Fixed effects:<br>coefficient<br>(contribution) | Static                           | SOC stock<br>(t ha <sup>-1</sup> )         | 0.003<br>(1 %)     | -0.003<br>(0.06 %) |
|                                                 |                                  | C/N ratio                                  | 0.05<br>(1 %)      | 0.07*<br>(10 %)    |
|                                                 | Semi<br>dynamic                  | root biomass<br>(g 100g <sup>-1</sup> )    | 0.06<br>(0.36 %)   | 0.09*<br>(12 %)    |
|                                                 |                                  | NDVI                                       | 0.90***<br>(18 %)  | -3.35**<br>(12 %)  |
|                                                 |                                  | Soil temp.<br>(°C)                         | 0.12***<br>(33 %)  | 0.39***<br>(18 %)  |
|                                                 | Dynamic                          | VWC<br>(cm <sup>3</sup> cm <sup>-3</sup> ) | -0.77***<br>(10 %) | -1.37**<br>(11 %)  |
| Random effects                                  | <i>ICC</i><br>(contribution)     |                                            | 0.18<br>(6 %)      | 0.06<br>(3 %)      |
| Model<br>performance                            | <i>Marginal R<sup>2</sup></i>    |                                            | 0.64               | 0.63               |
|                                                 | <i>Conditional R<sup>2</sup></i> |                                            | 0.70               | 0.66               |
|                                                 | <i>AIC</i>                       |                                            | 1386.00            | 50.10              |
|                                                 | <i>RMSE</i>                      |                                            | 0.64               | 0.25               |

326 Note. Significance level: \*\*\*  $p < 0.001$ , \*\*  $p < 0.01$ , \*  $p < 0.05$ . All CO<sub>2</sub> fluxes (unit:  $\mu\text{mol m}^{-2} \text{s}^{-1}$ ), soil temperature,  
327 and VWC data for spatial and seasonal patterns was from the LI8100 A system. To investigate the factors controlling  
328 spatial variations of CO<sub>2</sub> flux, we calculated the mean values of CO<sub>2</sub> flux, NDVI, soil temperature, and VWC of  
329 each site during the monitoring time.

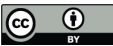

330 **3.3 Continuous hourly time series of CO<sub>2</sub> flux and hot moments**

331 Three dynamic variables (i.e., soil temp., VWC, air temp.) were taken into account to predict the time  
332 series of hourly CO<sub>2</sub> flux at different slope positions. These input variables were selected due to their  
333 influential roles in explaining the diurnal (Figure S3) and seasonal fluctuations of CO<sub>2</sub> emissions. As  
334 shown in Table 2, the temporal model yielded a robust performance in both training and testing dataset,  
335 achieving *R*<sup>2</sup> and *RMSE* values of 0.86 and 0.39 μmol m<sup>-2</sup> s<sup>-1</sup> and 0.74 and 0.57 μmol m<sup>-2</sup> s<sup>-1</sup>, respectively.

336 **Table 2.** Model performance for simulating time series of hourly CO<sub>2</sub> flux (unit: μmol m<sup>-2</sup> s<sup>-1</sup>) and mapping daily  
337 CO<sub>2</sub> flux (unit: μmol m<sup>-2</sup> s<sup>-1</sup>) across the landscape.

| Models         | Training dataset |                       | Testing dataset |                       |
|----------------|------------------|-----------------------|-----------------|-----------------------|
|                | <i>RMSE</i>      | <i>R</i> <sup>2</sup> | <i>RMSE</i>     | <i>R</i> <sup>2</sup> |
| Temporal model | 0.39             | 0.86                  | 0.57            | 0.74                  |
| Spatial model  | 0.50             | 0.81                  | 0.54            | 0.75                  |

338 Note. Temporal model used the natural logarithm of CO<sub>2</sub> flux data from LI8100 A and eosFD probes, whereas spatial  
339 model used the natural logarithm of CO<sub>2</sub> flux data only from LI8100 A.

340 The modelled CO<sub>2</sub> emissions at all slope positions display a clear seasonal trend, with higher CO<sub>2</sub> fluxes  
341 from June to September and lower estimates in other months, in line with the observed fluxes shown in  
342 brown dots (Figures 3c-3h). The total CO<sub>2</sub> fluxes (Table 3) at the summit (19.50 t ha<sup>-1</sup>) and the shoulder  
343 (dry: 19.47 t ha<sup>-1</sup>, wet: 16.31 t ha<sup>-1</sup>) slope positions were higher than that of topslope (14.45 t ha<sup>-1</sup>),  
344 followed by footslope (13.94 t ha<sup>-1</sup>) and backslope (11.54 t ha<sup>-1</sup>) (Table 3), consistent with the spatial  
345 patterns of our observations (Figure 3a). However, the modelled mean ± sd CO<sub>2</sub> fluxes at all slope  
346 positions (Table 3) were lower than measured CO<sub>2</sub> fluxes by the LI8100 A system. This is because the  
347 measurements were taken during the daytime when fluxes were higher (Figure 2), whereas the modeled  
348 values represent the average of both daytime and nighttime fluxes. Most hot moments occurred from  
349 June to September 2023, whereas few hot moments were observed from late July to the early August  
350 (Figures 3c-3h). Although these hot moments of different slope positions only accounted for 10 % across  
351 the year, they could contribute 28 %-31 % to the annual total CO<sub>2</sub> emissions (Table 3).



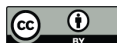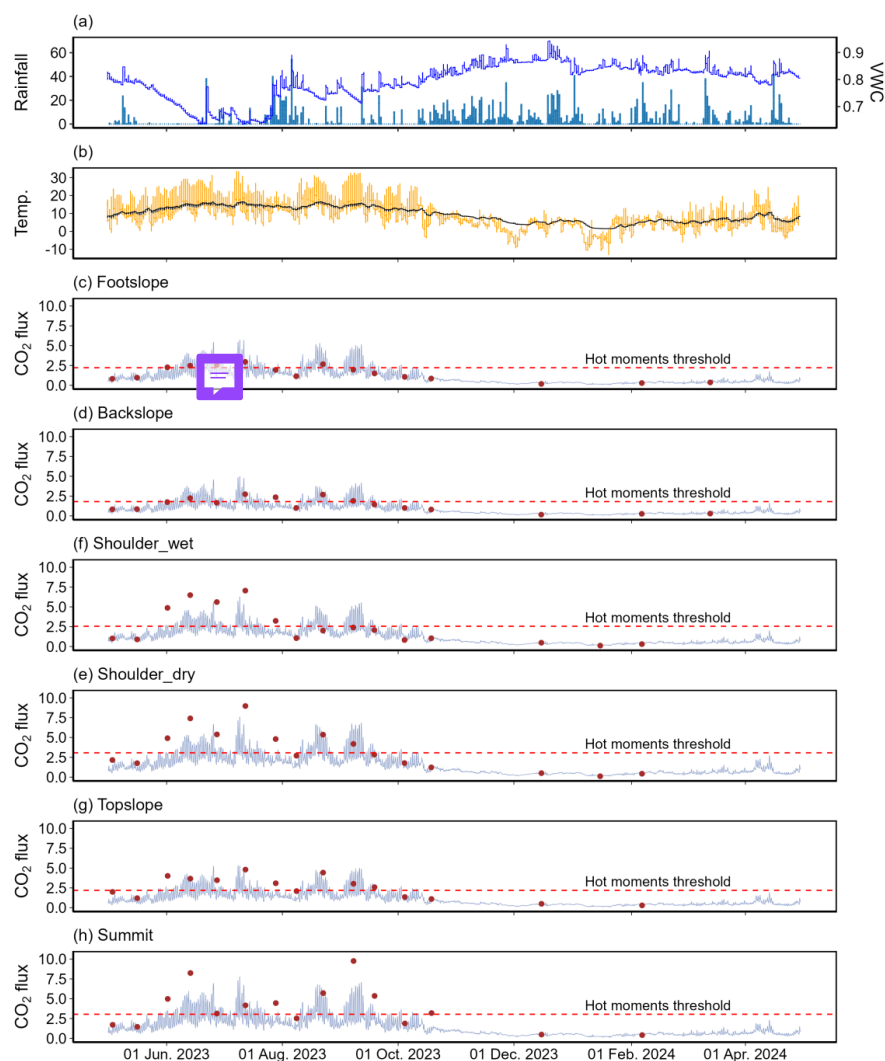

**Figure 3.** Time series of hourly rainfall (blue bar), hourly mean VWC (blue line) (a), hourly mean air temperature (orange line) and soil temperature (black line) (b), modelled hourly CO<sub>2</sub> flux (purple lines) and in-situ measurements (brown dots) at different slope positions (c-h). Rainfall (unit: mm) data was from the nearby meteorological observation station. The VWC (unit: cm<sup>3</sup> cm<sup>-3</sup>) and soil temperature (unit: °C) were mean values from five slope positions monitored by Teros12 sensors at a depth of 10 cm. Air temperatures (unit: °C) were mean values from 5 stations at 1.4 m height above ground. Measured CO<sub>2</sub> fluxes (unit: μmol m<sup>-2</sup> s<sup>-1</sup>) were from the LI8100A system.

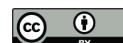

**Table 3.** Summary of modelled mean  $\pm$  sd CO<sub>2</sub> fluxes, thresholds for identifying hot moments, total CO<sub>2</sub> flux, and the contribution of hot moments to total flux at different slope positions.

| Slope position                                                                 | Footslope       | Backslope       | Shoulder<br>wet | Shoulder<br>dry | Topslope        | Summit          |
|--------------------------------------------------------------------------------|-----------------|-----------------|-----------------|-----------------|-----------------|-----------------|
| Mean $\pm$ sd CO <sub>2</sub> flux<br>( $\mu\text{mol m}^{-2} \text{s}^{-1}$ ) | 1.00 $\pm$ 0.91 | 0.83 $\pm$ 0.73 | 1.21 $\pm$ 0.99 | 1.44 $\pm$ 1.22 | 1.04 $\pm$ 0.86 | 1.41 $\pm$ 1.22 |
| Total CO <sub>2</sub> flux<br>(t ha <sup>-1</sup> )                            | 13.94           | 11.54           | 16.31           | 19.47           | 14.45           | 19.50           |
| Threshold<br>( $\mu\text{mol m}^{-2} \text{s}^{-1}$ )                          | 2.22            | 1.80            | 2.55            | 3.07            | 2.19            | 3.04            |
| Contribution<br>of hot moments                                                 | 30.74 %         | 30.31 %         | 28.99 %         | 28.41 %         | 28.91 %         | 29.93 %         |

### 3.4 Daily CO<sub>2</sub> flux maps and hot spots

A linear mixed-effects model was utilized to map daily CO<sub>2</sub> flux from 1 May 2023 to 30 April 2024, incorporating soil temperature, corrected TWI, and SOC stock as predictors due to their significant role in explaining the spatial-seasonal variability of CO<sub>2</sub> flux and their availability as spatial data. The mapping model yielded robust performance metrics (Table 2), with  $R^2$  and  $RMSE$  values of 0.81 and 0.50  $\mu\text{mol m}^{-2} \text{s}^{-1}$  in the training dataset, and 0.75 and 0.54  $\mu\text{mol m}^{-2} \text{s}^{-1}$  in the test dataset, respectively.

Consistent with our observations, the modelled soil respiration also displayed substantial spatial-temporal heterogeneity (Figures 4a-4d). More specifically, the mean CO<sub>2</sub> fluxes ranged from 0.17  $\mu\text{mol m}^{-2} \text{s}^{-1}$  to 10.80  $\mu\text{mol m}^{-2} \text{s}^{-1}$  in spring (Figure 4a), 0.36  $\mu\text{mol m}^{-2} \text{s}^{-1}$  to 30.60  $\mu\text{mol m}^{-2} \text{s}^{-1}$  in summer (Figure 4b), 0.18  $\mu\text{mol m}^{-2} \text{s}^{-1}$  to 14.87  $\mu\text{mol m}^{-2} \text{s}^{-1}$  in autumn (Figure 4c), and 0.04  $\mu\text{mol m}^{-2} \text{s}^{-1}$  to 2.24  $\mu\text{mol m}^{-2} \text{s}^{-1}$  in winter (Figure 4d). Many modelled mean CO<sub>2</sub> fluxes at the footslope and backslope (elevation < 660 m) remained below 2  $\mu\text{mol m}^{-2} \text{s}^{-1}$  (Figure 4e). In contrast, the modelled CO<sub>2</sub> emissions remained higher throughout the year at the shoulder (660 m  $\leq$  elevation  $\leq$  670 m) and east of summit (elevation > 675 m) with high vegetation cover. About 10 % of the area were identified as hot spots, with a high frequency of hot spots occurring in these regions, while the locations of sporadic hot spots varied over time (Figure 4f). Overall, the landscape emitted approximately 24.34 t ha<sup>-1</sup> CO<sub>2</sub> to the atmosphere during the simulation period, with 19.63 %  $\pm$  0.57 % of the CO<sub>2</sub> fluxes coming from the hot spots.

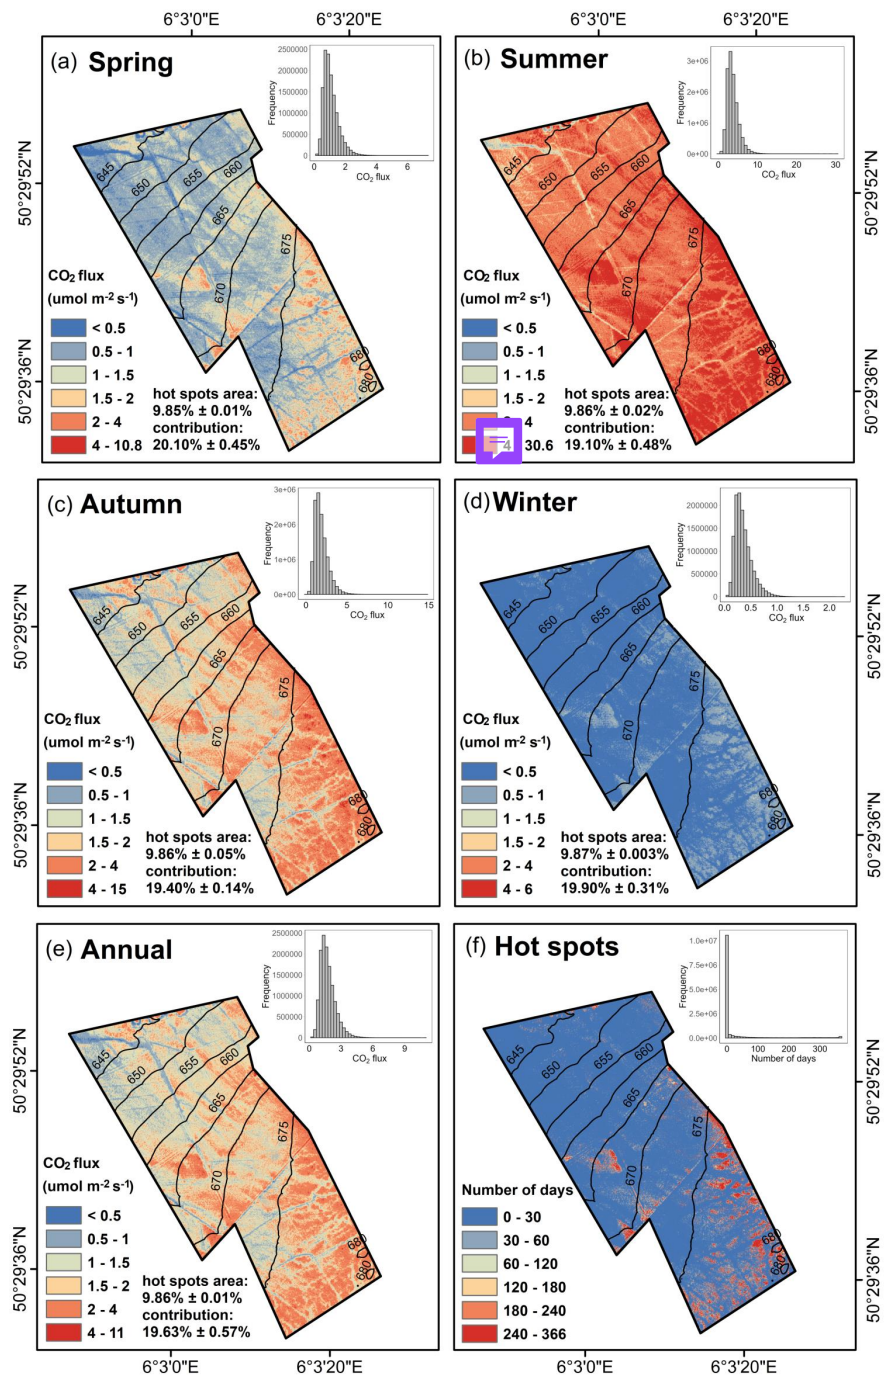

380  
381 **Figure 4.** Maps of modelled mean daily CO<sub>2</sub> flux ( $\mu\text{mol m}^{-2} \text{s}^{-1}$ ) in four seasons (a, b, c, d), throughout the year (e),  
382 and hot spot frequency (f). The histograms of pixel values are presented on the top-right corner of each map. The

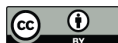

383 hot spots area proportion and CO<sub>2</sub> flux contribution from the hot spots of each season and across the year are

384 summarized in the corresponding maps.



## 385 4 Discussion

### 386 4.1 Drivers of spatiotemporal heterogeneity in CO<sub>2</sub> emission

387 Consistent with prior temperate peatland studies (Juszczak et al., 2013; Wilson et al., 2015; Danevčič et  
388 al., 2010; Swails et al., 2022), our results indicate that seasonal variations in soil CO<sub>2</sub> flux across the  
389 landscape are highly related to soil temperature, which could account for 33 % of the seasonal variability  
390 (Table 1). In contrast to tropical peatlands, where precipitation or water table fluctuations often dominate  
391 CO<sub>2</sub> flux dynamics (Hoyt et al., 2019; Cobb et al., 2017), our observations reveal that temperature  
392 exhibits distinct seasonal patterns (Figure 3b), which in turn drive fluctuations in soil respiration  
393 throughout the year (Figure 2c). Moreover, spatial heterogeneity in soil temperature further shaped  
394 landscape-scale CO<sub>2</sub> emission patterns (Table 1). For instance, the south-facing summit slopes, which  
395 receive more solar radiation in the daytime, consistently show higher CO<sub>2</sub> fluxes (Figure 2a). Conversely,  
396 the north-facing footslope and backslope, situated on the windward side, experience lower temperatures,  
397 resulting in generally lower soil respiration rates throughout the observation period (Figure 2a). While  
398 temperature is the dominant driver, soil water content influences oxygen availability within the peat  
399 profile, thereby regulating microbial decomposition and CO<sub>2</sub> production (Hatala et al., 2012; Knox et al.,  
400 2015; Zou et al., 2022; Huang et al., 2021; Deshmukh et al., 2021). For example, Knox et al. (2015)  
401 demonstrated that a declining water table caused by drainage increases oxygen penetration into the peat,  
402 resulting in higher CO<sub>2</sub> flux compared to restored peatlands. In our study case, the CO<sub>2</sub> fluxes were  
403 slightly higher in drier shoulder positions compared to wetter areas (Figure 2a), and VWC accounted for  
404 approximately 10 % of the spatial-seasonal variance in CO<sub>2</sub> fluxes (Table 1).

405 The monthly/biweekly NDVI is the second-most influential predictor for CO<sub>2</sub> seasonal fluctuations  
406 (Table 1), as NDVI reveals vegetation phenology during the monitoring period. In the spatial-pattern  
407 model, the contribution from root biomass becomes more substantial, together with mean NDVI  
408 explaining 24 % of spatial variance. These findings align with previous studies that vegetation mediates  
409 soil respiration through root respiration, exudates, litter inputs, and rhizosphere priming effects (Acosta  
410 et al., 2017; Wang et al., 2015a; Walker et al., 2016; Jovani-Sancho et al., 2021; Bragazza et al., 2013).  
411 In our study, the CO<sub>2</sub> fluxes of dwarf shrubs (i.e., *Vaccinium myrtillus*) were significantly lower than  
412 those in *Juncus acutus*-dominated areas (Figure 2b), likely due to the lower root biomass of dwarf shrubs



(Table S3). Furthermore, it has been shown that dwarf shrubs in northern peatlands produce high-phenolic litter with higher resistance to breakdown and introduce more water-soluble phenolics into the soil compared to *Sphagnum*/herbs (Bragazza et al., 2013; Wang et al., 2015a), which further constrains microbial activity and CO<sub>2</sub> production. In addition, vegetation cover may indirectly influence soil respiration by regulating surface microclimate conditions such as humidity and temperature (Nichols, 1998; Stoy et al., 2012).

As shown in Table 1, the SOC stock and C/N ratio have limited explanatory power for the seasonal variability of CO<sub>2</sub> flux, in line with findings of Danevčič et al. (2010). However, when analyzing drivers of average soil CO<sub>2</sub> flux rate across the entire monitoring period, the importance of C/N ratio increased nearly 11 times (Table 1). This likely reflects how long-term averaging integrates short-term dynamic variability, thereby amplifying the role of spatial heterogeneity mediated by the C/N ratio. Prior studies suggesting that the quality of organic material, rather than its quantity, primarily regulates CO<sub>2</sub> fluxes in peatlands (Hoyos-Santillan et al., 2016; Leifeld et al., 2012). Specifically, the soil C/N ratio is known to regulate microbial community functionality and respiration intensity (Leifeld et al., 2020; Briones et al., 2014; Ishikura et al., 2018; Wang et al., 2015b).

## 4.2 CO<sub>2</sub> emission hot moments and hot spots: identification, implications, and importance

### 4.2.1 Temporal analysis and hot moments

During past decades, efforts have been made to model CO<sub>2</sub> flux over time based on its relationship with environmental factors such as hydrology, temperature, substrate quality, microbial community, and vegetation (Hoyt et al., 2019; Junttila et al., 2021; Schubert et al., 2010; Rowson et al., 2012; Abdalla et al., 2014; Farmer et al., 2011; Anthony and Silver, 2021). In our study, diurnal cycles of CO<sub>2</sub> fluxes are closely related to air temperature (Figure S3), while soil temperature and moisture are important factors in explaining the seasonal patterns of CO<sub>2</sub> flux (Table 1). Hence, the three dynamic environment variables were incorporated into the model to simulate the hourly CO<sub>2</sub> flux across the entire monitoring period. Overall, the temporal model demonstrated robust performance in both the training and testing datasets (Table 2) and effectively captured seasonal and diurnal trends at most sites (Figures 3c-3h). However, the modelled peak values are lower than the observations at shoulder and summit slope positions (Figures



440 3f, 3e, 3h), which may be partially due to the limited number of high-value observations in these areas.  
441 Consequently, the model is more influenced by the more frequent lower CO<sub>2</sub> fluxes, leading to an overall  
442 underestimation of the peak. In addition, two types of gas analyzers were employed to monitor CO<sub>2</sub> flux  
443 with different sampling frequency and time: the LI-8100A sensor was used biweekly or monthly to  
444 capture seasonal trends, while eosFD probes collected data every five minutes to track diurnal  
445 fluctuations. The integration of these datasets for modelling temporal dynamics improved estimation  
446 accuracy but might also introduce uncertainties into the model.

447 Anthony and Silver (2023) demonstrated that identifying hot moments of CO<sub>2</sub> flux in peatland requires  
448 intensive continuous measurements, while as an alternative, our robust simulation of hourly CO<sub>2</sub> flux  
449 enabled the identification of hot moments in a complex landscape. We found that most of these hot  
450 moments occurred during the summer and early autumn seasons (Figure 3c-3h), in agreement with our  
451 in-situ observations (Figure 2c). The frequent high CO<sub>2</sub> emissions in June and July can be attributed to  
452 the low precipitation, decreased soil moisture, and high temperatures (Figure 3a-3b). However, few hot  
453 moments were captured during late July and early August due to the heavy rainfall even  figure 3a).  
454 This absence may be attributed to the fact that intense rainfall led to lower temperatures and increased  
455 soil moisture (Figures 3a, 3b), thereby suppressing microbial and root respiration (Hoyt et al., 2019).  
456 Following this period, CO<sub>2</sub> emissions reached values that exceeded the 'hot moments' threshold in mid-  
457 August, aligning with declining rainfall and rising temperatures (Figures 3c-3h). The hot moments  
458 observed in September are linked to seasonal fluctuations in precipitation and temperature (Figures  
459 3a,3b).

460 Similar to the findings of Anthony and Silver (2021) and Kannenberg et al. (2020), these hot moments  
461 accounted for approximately 10 % throughout the year, while they contributed significantly to the annual  
462 total CO<sub>2</sub> emissions (28 %-31 %; Table 3), highlighting the important role of short-term high-emission  
463 events in the overall carbon emission. Therefore, missing hot moments may lead to significant  
464 underestimates of total peat soil respiration budgets. Despite continuous automated chamber or eddy  
465 covariance measurements that are ideal for capturing hot moments of CO<sub>2</sub> emissions (Anthony and Silver,  
466 2023; Hoyt et al., 2019; Anthony and Silver, 2021), long-term continuous monitoring is still labor-  
467 intensive and cost-prohibitive in many locations within the complex peatland ecosystems. Given that we



468 observed a concentration of hot moments in the summer and autumn, we recommend increasing  
469 monitoring frequency during these seasons for temperate peatlands. This strategy would help capture  
470 carbon emission dynamics more effectively, reduce uncertainties in annual carbon flux estimates, and  
471 provide more representative peatland CO<sub>2</sub> flux data.

#### 472 4.2.2 Spatial analysis of CO<sub>2</sub> fluxes and hot spots

473 Our mapping of CO<sub>2</sub> flux across the landscape yielded a model performance of  $R^2 = 0.75$  and  $RMSE =$   
474  $0.54 \mu\text{mol m}^{-2} \text{s}^{-1}$  for the test dataset (Table 2). This can be attributed to the incorporation of key  
475 environmental factors that drive the spatiotemporal heterogeneity of soil respiration into the model inputs.  
476 These factors – including soil temperature, corrected TWI, and SOC stock – can be directly obtained  
477 through multi-sensor UAV remote sensing or estimated using high spatiotemporal resolution data.  
478 Previous studies upscaled spatial carbon fluxes using area-weighted methods, extrapolating point data  
479 from CO<sub>2</sub> chamber flux measurements to adjacent or larger areas based on land cover maps (Van  
480 Giersbergen et al., 2024; Webster et al., 2008; Leon et al., 2014). However, this approach can lead to  
481 over- or underestimation (Wangari et al., 2023; Leifeld and Menichetti, 2018), because our findings  
482 reveal that even within the same vegetation cover, such as *Molinia caerulea*, CO<sub>2</sub> emissions exhibit  
483 significant spatial-temporal variability (Figure 2b). In recent years, spatial upscaling of CO<sub>2</sub> fluxes has  
484 increasingly relied on satellite-based remote sensing data (e.g., Junttila et al. (2021); Wangari et al. (2023);  
485 Zhang et al. (2020); Azevedo et al. (2021); Huang et al. (2015)). While this method covers larger areas,  
486 it is often constrained by coarse temporal and spatial resolutions. The peatland ecosystem is characterized  
487 by great temporal and spatial heterogeneity at small scales, and ignoring these variations can introduce  
488 significant uncertainties in CO<sub>2</sub> emission estimates. Our study demonstrates that high-resolution UAV  
489 remote sensing imagery, with fine temporal and spatial scales, could effectively upscale CO<sub>2</sub> fluxes from  
490 point measurements across a heterogeneous landscape, thereby reducing uncertainties in spatial  
491 predictions of CO<sub>2</sub> fluxes.

492 Furthermore, the high-resolution CO<sub>2</sub> flux maps allowed for the identification of hot spot areas across  
493 the landscape. We found that most of the hot spots occurred at the shoulder areas where soil moisture  
494 was relatively lower and to the east of the summit which is covered by dense vegetation (Figure 1b,  
495 Figure 4f). Spatial variability in the factors controlling biogeochemical processes, such as soil





496 temperature, moisture, water table depth, vegetation type, and substrate quality, is likely driving these  
497 differences (Anthony and Silver, 2023; Kuzyakov and Blagodatskaya, 2015; Mcnamara et al., 2008). For  
498 instance, the tree-covered areas at the summit contribute substantial root respiration, which may, in turn,  
499 trigger the formation of consistent hot pots throughout the year. Besides, litterfall beneath trees insulates  
500 the peat soil and provides an abundant resource for microbial activity.

501 High-emission events from hot spots play a crucial role in overall CO<sub>2</sub> fluxes (Anthony and Silver, 2023),  
502 hence, neglecting these areas could lead to substantial underestimation of peatland carbon emissions. In  
503 our study, although less than 10 % of area was identified as hot spots, their CO<sub>2</sub> flux contribution  
504 accounted for nearly 20 % across the year (Figure 4). However, research specifically focusing on  
505 peatland CO<sub>2</sub> emission hot spots remains limited (Anthony and Silver, 2023), despite increased  
506 exploration of greenhouse gas emission hot spots in other ecosystems (e.g., agricultural field (Krichels  
507 and Yang, 2019; Rey-Sanchez et al., 2022; Leifeld et al., 2020); wetland (Rey-Sanchez et al., 2022);  
508 water-limited Mediterranean ecosystem (Leon et al., 2014); forest (Wangari et al., 2023)). Hence, to  
509 improve the accuracy of CO<sub>2</sub> spatial budgeting for peatlands, there is a need for enhanced high-resolution  
510 dynamic monitoring of hot spot areas (Becker et al., 2008). Our study demonstrates the great potential  
511 of UAV technology for peatland hot spot identification and quantification, offering new insights into  
512 studying soil respiration within heterogeneous ecosystems as well as optimizing peatland management  
513 and CO<sub>2</sub> emission reduction strategies.

514

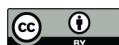

## 515    **5 Conclusion**

516    In this study, we monitored the dynamics of peatland surface and subsurface environments using both  
517    field surveys and multi-sensor UAVs at high spatial-temporal resolution. We investigated the influence  
518    of dynamic and static environmental factors on soil respiration rates across different scales, thereby  
519    enhancing our understanding of peatland carbon cycling. Additionally, we simulated CO<sub>2</sub> flux with high  
520    spatial-temporal resolution by integrating field measurements and UAV data. These reliable modelling  
521    allow us to identify and quantify CO<sub>2</sub> emission hot spots and hot moments across the landscape. To  
522    summarize, the main findings of our study are as follows:

523    (1) Soil respiration rates vary significantly across space and time, influenced by both dynamic and  
524    relatively static environmental factors at different scales. Temperature is the primary driver of CO<sub>2</sub> flux  
525    variations, explaining 33 % CO<sub>2</sub> seasonal variability and 18 % spatial variability. Soil moisture  
526    negatively affects both seasonal and spatial variations, accounting for 10 % - 11 % of the variance. Semi-  
527    dynamic factors (i.e., NDVI and root biomass) contribute 19 % to seasonal variability and 24 % to spatial  
528    variability. While relative static factors (i.e., the C/N and SOC stock) have little impact on the seasonal  
529    CO<sub>2</sub> flux variability, the contribution of the C/N ratio increases nearly 11 times for spatial variability.

530    (2) Predicting temporal series of hourly CO<sub>2</sub> flux can be effectively achieved (test set:  $R^2 = 0.74$ ,  $RMSE$   
531     $= 0.57 \mu\text{mol m}^{-2} \text{s}^{-1}$ ) by considering its relationship with key environmental variables such as air  
532    temperature, soil temperature and soil moisture, all of which are relatively straightforward to monitor.  
533    These reliable time series data provide a foundation for capturing respiration pulses occurring over short  
534    periods, with hot moments primarily occurring in summer and early autumn.

535    (3) The UAV remote sensing data can yield robust spatial mapping of soil respiration rates across  
536    heterogeneous landscapes, with  $RMSE$  and  $R^2$  values of  $0.54 \mu\text{mol m}^{-2} \text{s}^{-1}$  and 0.75 in the test dataset,  
537    respectively. These high-resolution CO<sub>2</sub> flux maps enable us to locate hot spots.

538    (4) Despite representing 10 % of time within one year, CO<sub>2</sub> fluxes from hot moments contribute 28 %-  
539    31 % to the overall CO<sub>2</sub> flux budgets. Approximately 10 % areas are identified as hot spots, while  
540    contributing  $19.63 \% \pm 0.57 \%$  of total CO<sub>2</sub> fluxes. The locations of high-frequency hot spots remain  
541    consistent, while the locations of sporadic hot spots vary over time.



542 **Code and data availability**

543 Code and data will be made available on request.

544

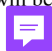

545 **CRedit authorship contribution statement**

546 **YL:** Writing – original draft, Visualization, Investigation, Formal analysis, Conceptualization. **MH:**  
547 Writing – review & editing, Investigation. **AM:** Writing – review & editing. **SL:** Writing – review &  
548 editing, Funding acquisition, Conceptualization. **SO:** Writing – review & editing, Funding acquisition,  
549 Conceptualization. **VV:** Writing – review & editing, Funding acquisition, Conceptualization. **FJ:** Writing  
550 – review & editing, Funding acquisition, Supervision, Conceptualization. **KVO:** Writing – review &  
551 editing, Investigation, Funding acquisition, Supervision, Conceptualization.

552

553 **Declaration of Competing Interest**

554 The authors declare that they do not have any commercial or associative interest that represents a conflict  
555 of interest in connection with the work submitted.

556

557 **Acknowledgements**

558 Yanfei Li wishes to thank the joint grant from China Scholarship Council and UCLouvain (No.  
559 202106380030). Kristof Van Oost, Sophie Opfergelt, and Sébastien Lambot are supported by the *Fonds*  
560 *de la Recherche Scientifique* (FNRS). The authors would like to thank the *Département de la Nature et*  
561 *des Forêts* (DNF) and Joël Verdin for giving access to the study site. The authors would like to thank  
562 Dylan Vellut for his assistance with soil respiration measurements and UAV campaigns.

563

564 **Financial support**

565 This work is an *Action de Recherche Concertée*, n° 21/26–119, funded by the *Communauté française*  
566 *de Belgique*.



567 **References**

- 568 Abdalla, M., Hastings, A., Bell, M. J., Smith, J. U., Richards, M., Nilsson, M. B., Peichl, M., Löfvenius,  
569 M. O., Lund, M., Helfter, C., Nemitz, E., Sutton, M. A., Aurela, M., Lohila, A., Laurila, T., Dolman, A.  
570 J., Beletti-Marchesini, L., Pogson, M., Jones, E., Drewer, J., Drosler, M., and Smith, P.: Simulation of  
571 CO<sub>2</sub> and Attribution Analysis at Six European Peatland Sites Using the ECOSSE Model, Water, Air, &  
572 Soil Pollution, 225, 2182, 10.1007/s11270-014-2182-8, 2014.
- 573 Acosta, M., Juszczak, R., Chojnicki, B., Pavelka, M., Havráňková, K., Lesny, J., Krupková, L., Urbaniak,  
574 M., Macháčová, K., and Olejnik, J.: CO<sub>2</sub> Fluxes from Different Vegetation Communities on a Peatland  
575 Ecosystem, Wetlands, 37, 423-435, 10.1007/s13157-017-0878-4, 2017.
- 576 Anthony, T. L. and Silver, W. L.: Hot moments drive extreme nitrous oxide and methane emissions from  
577 agricultural peatlands, Global Change Biology, 27, 5141-5153, <https://doi.org/10.1111/gcb.15802>, 2021.
- 578 Anthony, T. L. and Silver, W. L.: Hot spots and hot moments of greenhouse gas emissions in agricultural  
579 peatlands, Biogeochemistry, 10.1007/s10533-023-01095-y, 2023.
- 580 Arias-Navarro, C., Díaz-Pinés, E., Klatt, S., Brandt, P., Rufino, M. C., Butterbach-Bahl, K., and Verchot,  
581 L. V.: Spatial variability of soil N<sub>2</sub>O and CO<sub>2</sub> fluxes in different topographic positions in a tropical  
582 montane forest in Kenya, Journal of Geophysical Research: Biogeosciences, 122, 514-527,  
583 <https://doi.org/10.1002/2016JG003667>, 2017.
- 584 Azevedo, O., Parker, T. C., Siewert, M. B., and Subke, J.-A.: Predicting Soil Respiration from Plant  
585 Productivity (NDVI) in a Sub-Arctic Tundra Ecosystem, 10.3390/rs13132571, 2021.
- 586 Bates, D., Mächler, M., Bolker, B., and Walker, S.: Fitting Linear Mixed-Effects Models Using lme4,  
587 Journal of Statistical Software, 67, 1 - 48, 10.18637/jss.v067.i01, 2015.
- 588 Becker, T., Kutzbach, L., Forbrich, I., Schneider, J., Jager, D., Thees, B., and Wilmking, M.: Do we miss  
589 the hot spots? – The use of very high resolution aerial photographs to quantify carbon fluxes in peatlands,  
590 Biogeosciences, 5, 1387-1393, 10.5194/bg-5-1387-2008, 2008.
- 591 Bragazza, L., Parisod, J., Buttler, A., and Bardgett, R. D.: Biogeochemical plant–soil microbe feedback  
592 in response to climate warming in peatlands, Nature Climate Change, 3, 273-277, 10.1038/nclimate1781,  
593 2013.
- 594 Briones, M. J. I., McNamara, N. P., Poskitt, J., Crow, S. E., and Ostle, N. J.: Interactive biotic and abiotic  
595 regulators of soil carbon cycling: evidence from controlled climate experiments on peatland and boreal



596 soils, *Global Change Biology*, 20, 2971-2982, <https://doi.org/10.1111/gcb.12585>, 2014.

597 Bubier, J. L., Bhatia, G., Moore, T. R., Roulet, N. T., and Lafleur, P. M.: Spatial and Temporal Variability  
598 in Growing-Season Net Ecosystem Carbon Dioxide Exchange at a Large Peatland in Ontario, Canada,  
599 *Ecosystems*, 6, 353-367, 10.1007/s10021-003-0125-0, 2003.

600 Cobb, A. R., Hoyt, A. M., Gandois, L., Eri, J., Dommain, R., Abu Salim, K., Kai, F. M., Haji Su'ut, N.  
601 S., and Harvey, C. F.: How temporal patterns in rainfall determine the geomorphology and carbon fluxes  
602 of tropical peatlands, *Proceedings of the National Academy of Sciences*, 114, E5187-E5196,  
603 10.1073/pnas.1701090114, 2017.

604 Danevčič, T., Mandic-Mulec, I., Stres, B., Stopar, D., and Hacin, J.: Emissions of CO<sub>2</sub>, CH<sub>4</sub> and N<sub>2</sub>O  
605 from Southern European peatlands, *Soil Biology and Biochemistry*, 42, 1437-1446,  
606 <https://doi.org/10.1016/j.soilbio.2010.05.004>, 2010.

607 Deshmukh, C. S., Julius, D., Desai, A. R., Asyhari, A., Page, S. E., Nardi, N., Susanto, A. P., Nurholis,  
608 N., Hendrizal, M., Kurnianto, S., Suardiwerianto, Y., Salam, Y. W., Agus, F., Astiani, D., Sabiham, S.,  
609 Gauci, V., and Evans, C. D.: Conservation slows down emission increase from a tropical peatland in  
610 Indonesia, *Nature Geoscience*, 14, 484-490, 10.1038/s41561-021-00785-2, 2021.

611 Dorrepaal, E., Toet, S., van Logtestijn, R. S. P., Swart, E., van de Weg, M. J., Callaghan, T. V., and Aerts,  
612 R.: Carbon respiration from subsurface peat accelerated by climate warming in the subarctic, *Nature*,  
613 460, 616-619, <https://doi.org/10.1038/nature08216>, 2009.

614 Evans, C. D., Peacock, M., Baird, A. J., Artz, R. R. E., Burden, A., Callaghan, N., Chapman, P. J., Cooper,  
615 H. M., Coyle, M., Craig, E., Cumming, A., Dixon, S., Gauci, V., Grayson, R. P., Helfter, C., Heppell, C.  
616 M., Holden, J., Jones, D. L., Kaduk, J., Levy, P., Matthews, R., McNamara, N. P., Misselbrook, T., Oakley,  
617 S., Page, S. E., Rayment, M., Ridley, L. M., Stanley, K. M., Williamson, J. L., Worrall, F., and Morrison,  
618 R.: Overriding water table control on managed peatland greenhouse gas emissions, *Nature*, 593, 548-552,  
619 10.1038/s41586-021-03523-1, 2021.

620 Fang, C. and Moncrieff, J. B.: The dependence of soil CO<sub>2</sub> efflux on temperature, *Soil Biology and*  
621 *Biochemistry*, 33, 155-165, [https://doi.org/10.1016/S0038-0717\(00\)00125-5](https://doi.org/10.1016/S0038-0717(00)00125-5), 2001.

622 Farmer, J., Matthews, R., Smith, J. U., Smith, P., and Singh, B. K.: Assessing existing peatland models  
623 for their applicability for modelling greenhouse gas emissions from tropical peat soils, *Current Opinion*  
624 *in Environmental Sustainability*, 3, 339-349, <https://doi.org/10.1016/j.cosust.2011.08.010>, 2011.



- 625 Fernandez-Bou, A. S., Dierick, D., Allen, M. F., and Harmon, T. C.: Precipitation-drainage cycles lead  
626 to hot moments in soil carbon dioxide dynamics in a Neotropical wet forest, *Global Change Biology*, 26,  
627 5303-5319, 10.1111/gcb.15194, 2020.
- 628 Fox, J. and Monette, G.: Generalized Collinearity Diagnostics, *Journal of the American Statistical*  
629 *Association*, 87, 178-183, <https://doi.org/10.2307/2290467>, 1992.
- 630 Frankard, P., Ghiette, P., Hindryckx, M.-N., Schumacker, R., and Wastiaux, C.: Peatlands of Wallony (S-  
631 Belgium), SUO, Helsinki, Finland, 01/01, 33-37,
- 632 Frei, S., Knorr, K. H., Peiffer, S., and Fleckenstein, J. H.: Surface micro-topography causes hot spots of  
633 biogeochemical activity in wetland systems: A virtual modeling experiment, *Journal of Geophysical*  
634 *Research: Biogeosciences*, 117, <https://doi.org/10.1029/2012JG002012>, 2012.
- 635 García-García, A., Cuesta-Valero, F. J., Miralles, D. G., Mahecha, M. D., Quaas, J., Reichstein, M.,  
636 Zscheischler, J., and Peng, J.: Soil heat extremes can outpace air temperature extremes, *Nature Climate*  
637 *Change*, 13, 1237-1241, 10.1038/s41558-023-01812-3, 2023.
- 638 Harris, A. and Baird, A. J.: Microtopographic Drivers of Vegetation Patterning in Blanket Peatlands  
639 Recovering from Erosion, *Ecosystems*, 22, 1035-1054, <https://doi.org/10.1007/s10021-018-0321-6>,  
640 2019.
- 641 Hatala, J. A., Detto, M., Sonnentag, O., Deverel, S. J., Verfaillie, J., and Baldocchi, D. D.: Greenhouse  
642 gas (CO<sub>2</sub>, CH<sub>4</sub>, H<sub>2</sub>O) fluxes from drained and flooded agricultural peatlands in the Sacramento-San  
643 Joaquin Delta, *Agriculture, Ecosystems & Environment*, 150, 1-18,  
644 <https://doi.org/10.1016/j.agee.2012.01.009>, 2012.
- 645 Henrion, M., Li, Y., Wu, K., Jonard, F., Opfergelt, S., Vanacker, V., Van Oost, K., and Lambot, S.: Drone-  
646 Borne Ground-Penetrating Radar Reveals Spatiotemporal Moisture Dynamics in Peatland Root Zones,  
647 Available at SSRN, <http://dx.doi.org/10.2139/ssrn.5098978>, 2025.
- 648 Hopple, A. M., Wilson, R. M., Kolton, M., Zalman, C. A., Chanton, J. P., Kostka, J., Hanson, P. J., Keller,  
649 J. K., and Bridgham, S. D.: Massive peatland carbon banks vulnerable to rising temperatures, *Nature*  
650 *Communications*, 11, 2373, 10.1038/s41467-020-16311-8, 2020.
- 651 Hoyos-Santillan, J., Lomax, B. H., Large, D., Turner, B. L., Boom, A., Lopez, O. R., and Sjögersten, S.:  
652 Quality not quantity: Organic matter composition controls of CO<sub>2</sub> and CH<sub>4</sub> fluxes in neotropical peat  
653 profiles, *Soil Biology and Biochemistry*, 103, 86-96, <https://doi.org/10.1016/j.soilbio.2016.08.017>, 2016.



654 Hoyt, A. M., Gandois, L., Eri, J., Kai, F. M., Harvey, C. F., and Cobb, A. R.: CO<sub>2</sub> emissions from an  
655 undrained tropical peatland: Interacting influences of temperature, shading and water table depth, *Global*  
656 *Change Biology*, 25, 2885-2899, <https://doi.org/10.1111/gcb.14702>, 2019.

657 Huang, N., Gu, L., Black, T. A., Wang, L., and Niu, Z.: Remote sensing-based estimation of annual soil  
658 respiration at two contrasting forest sites, *Journal of Geophysical Research: Biogeosciences*, 120, 2306-  
659 2325, <https://doi.org/10.1002/2015JG003060>, 2015.

660 Huang, Y., Ciais, P., Luo, Y., Zhu, D., Wang, Y., Qiu, C., Goll, D. S., Guenet, B., Makowski, D., De Graaf,  
661 I., Leifeld, J., Kwon, M. J., Hu, J., and Qu, L.: Tradeoff of CO<sub>2</sub> and CH<sub>4</sub> emissions from global peatlands  
662 under water-table drawdown, *Nature Climate Change*, 11, 618-622, [https://doi.org/10.1038/s41558-021-](https://doi.org/10.1038/s41558-021-01059-w)  
663 [01059-w](https://doi.org/10.1038/s41558-021-01059-w), 2021.

664 Ishikura, K., Darung, U., Inoue, T., and Hatano, R.: Variation in Soil Properties Regulate Greenhouse  
665 Gas Fluxes and Global Warming Potential in Three Land Use Types on Tropical Peat,  
666 10.3390/atmos9120465, 2018.

667 Jovani-Sancho, A. J., Cummins, T., and Byrne, K. A.: Soil carbon balance of afforested peatlands in the  
668 maritime temperate climatic zone, *Global Change Biology*, 27, 3681-3698,  
669 <https://doi.org/10.1111/gcb.15654>, 2021.

670 Junttila, S., Kelly, J., Kljun, N., Aurela, M., Klemetsson, L., Lohila, A., Nilsson, M. B., Rinne, J., Tuittila,  
671 E.-S., Vestin, P., Weslien, P., and Eklundh, L.: Upscaling Northern Peatland CO<sub>2</sub> Fluxes Using Satellite  
672 Remote Sensing Data, 10.3390/rs13040818, 2021.

673 Juszczak, R., Humphreys, E., Acosta, M., Michalak-Galczevska, M., Kayzer, D., and Olejnik, J.:  
674 Ecosystem respiration in a heterogeneous temperate peatland and its sensitivity to peat temperature and  
675 water table depth, *Plant and Soil*, 366, 505-520, 10.1007/s11104-012-1441-y, 2013.

676 Kannenberg, S. A., Bowling, D. R., and Anderegg, W. R. L.: Hot moments in ecosystem fluxes: High  
677 GPP anomalies exert outsized influence on the carbon cycle and are differentially driven by moisture  
678 availability across biomes, *Environmental Research Letters*, 15, 054004, 10.1088/1748-9326/ab7b97,  
679 2020.

680 Kelly, J., Kljun, N., Eklundh, L., Klemetsson, L., Liljebladh, B., Olsson, P.-O., Weslien, P., and Xie, X.:  
681 Modelling and upscaling ecosystem respiration using thermal cameras and UAVs: Application to a  
682 peatland during and after a hot drought, *Agricultural and Forest Meteorology*, 300, 108330,



- 683 <https://doi.org/10.1016/j.agrformet.2021.108330>, 2021.
- 684 Kim, J. and Verma, S. B.: Soil surface CO<sub>2</sub> flux in a Minnesota peatland, *Biogeochemistry*, 18, 37-51,  
685 10.1007/BF00000425, 1992.
- 686 Knox, S. H., Sturtevant, C., Matthes, J. H., Koteen, L., Verfaillie, J., and Baldocchi, D.: Agricultural  
687 peatland restoration: effects of land-use change on greenhouse gas (CO<sub>2</sub> and CH<sub>4</sub>) fluxes in the  
688 Sacramento-San Joaquin Delta, *Global Change Biology*, 21, 750-765, <https://doi.org/10.1111/gcb.12745>,  
689 2015.
- 690 Krichels, A. H. and Yang, W. H.: Dynamic Controls on Field-Scale Soil Nitrous Oxide Hot Spots and  
691 Hot Moments Across a Microtopographic Gradient, *Journal of Geophysical Research: Biogeosciences*,  
692 124, 3618-3634, <https://doi.org/10.1029/2019JG005224>, 2019.
- 693 Kuzyakov, Y. and Blagodatskaya, E.: Microbial hotspots and hot moments in soil: Concept & review,  
694 *Soil Biology and Biochemistry*, 83, 184-199, <https://doi.org/10.1016/j.soilbio.2015.01.025>, 2015.
- 695 Lees, K. J., Quaife, T., Artz, R. R. E., Khomik, M., and Clark, J. M.: Potential for using remote sensing  
696 to estimate carbon fluxes across northern peatlands – A review, *Science of The Total Environment*, 615,  
697 857-874, <https://doi.org/10.1016/j.scitotenv.2017.09.103>, 2018.
- 698 Leifeld, J. and Menichetti, L.: The underappreciated potential of peatlands in global climate change  
699 mitigation strategies, *Nature Communications*, 9, 1071, 10.1038/s41467-018-03406-6, 2018.
- 700 Leifeld, J., Klein, K., and Wüst-Galley, C.: Soil organic matter stoichiometry as indicator for peatland  
701 degradation, *Scientific Reports*, 10, 7634, 10.1038/s41598-020-64275-y, 2020.
- 702 Leifeld, J., Steffens, M., and Galego-Sala, A.: Sensitivity of peatland carbon loss to organic matter quality,  
703 *Geophysical Research Letters*, 39, <https://doi.org/10.1029/2012GL051856>, 2012.
- 704 Leifeld, J., Wüst-Galley, C., and Page, S.: Intact and managed peatland soils as a source and sink of  
705 GHGs from 1850 to 2100, *Nature Climate Change*, 9, 945-947, 10.1038/s41558-019-0615-5, 2019.
- 706 Leon, E., Vargas, R., Bullock, S., Lopez, E., Panosso, A. R., and La Scala, N.: Hot spots, hot moments,  
707 and spatio-temporal controls on soil CO<sub>2</sub> efflux in a water-limited ecosystem, *Soil Biology and*  
708 *Biochemistry*, 77, 12-21, <https://doi.org/10.1016/j.soilbio.2014.05.029>, 2014.
- 709 Li, Y., Henrion, M., Moore, A., Lambot, S., Opfergelt, S., Vanacker, V., Jonard, F., and Van Oost, K.:  
710 Factors controlling peat soil thickness and carbon storage in temperate peatlands based on UAV high-  
711 resolution remote sensing, *Geoderma*, 449, 117009, <https://doi.org/10.1016/j.geoderma.2024.117009>,





- 712 2024.
- 713 Mason, C. W., Stoof, C. R., Richards, B. K., Das, S., Goodale, C. L., and Steenhuis, T. S.: Hotspots of  
714 Nitrous Oxide Emission in Fertilized and Unfertilized Perennial Grasses, Soil Science Society of  
715 America Journal, 81, 450-458, <https://doi.org/10.2136/sssaj2016.08.0249>, 2017.
- 716 McClain, M. E., Boyer, E. W., Dent, C. L., Gergel, S. E., Grimm, N. B., Groffman, P. M., Hart, S. C.,  
717 Harvey, J. W., Johnston, C. A., Mayorga, E., McDowell, W. H., and Pinay, G.: Biogeochemical Hot Spots  
718 and Hot Moments at the Interface of Terrestrial and Aquatic Ecosystems, Ecosystems, 6, 301-312,  
719 10.1007/s10021-003-0161-9, 2003.
- 720 McNamara, N. P., Plant, T., Oakley, S., Ward, S., Wood, C., and Ostle, N.: Gully hotspot contribution to  
721 landscape methane (CH<sub>4</sub>) and carbon dioxide (CO<sub>2</sub>) fluxes in a northern peatland, Science of The Total  
722 Environment, 404, 354-360, <https://doi.org/10.1016/j.scitotenv.2008.03.015>, 2008.
- 723 Meehl, G. A. and Tebaldi, C.: More Intense, More Frequent, and Longer Lasting Heat Waves in the 21st  
724 Century, Science, 305, 994-997, 10.1126/science.1098704, 2004.
- 725 Minasny, B., Berglund, Ö., Connolly, J., Hedley, C., de Vries, F., Gimona, A., Kempen, B., Kidd, D.,  
726 Lilja, H., Malone, B., McBratney, A., Roudier, P., O'Rourke, S., Rudiyanto, Padarian, J., Poggio, L., ten  
727 Caten, A., Thompson, D., Tuve, C., and Widyatmanti, W.: Digital mapping of peatlands – A critical  
728 review, Earth-Science Reviews, 196, 102870, <https://doi.org/10.1016/j.earscirev.2019.05.014>, 2019.
- 729 Moore, P. A., Lukenbach, M. C., Thompson, D. K., Kettridge, N., Granath, G., and Waddington, J. M.:  
730 Assessing the peatland hummock–hollow classification framework using high-resolution elevation  
731 models: implications for appropriate complexity ecosystem modeling, Biogeosciences, 16, 3491-3506,  
732 10.5194/bg-16-3491-2019, 2019.
- 733 Mormal, P. and Tricot, C.: Aperçu climatique des Hautes-Fagnes, Institut Royal météorologique de  
734 Belgique, Brussel, 2004.
- 735 Murdoch, D. J. and Chow, E. D.: A Graphical Display of Large Correlation Matrices, The American  
736 Statistician, 50, 178-180, <https://doi.org/10.2307/2684435>, 1996.
- 737 Nakagawa, S., Johnson, P. C. D., and Schielzeth, H.: The coefficient of determination R<sup>2</sup> and intra-class  
738 correlation coefficient from generalized linear mixed-effects models revisited and expanded, Journal of  
739 The Royal Society Interface, 14, 20170213, 10.1098/rsif.2017.0213, 2017.
- 740 Nichols, D. S.: Temperature of upland and peatland soils in a north central Minnesota forest, Canadian



- 741 Journal of Soil Science, 78, 493-509, 10.4141/S96-030, 1998.
- 742 Pajula, R. and Purre, A.-H.: NDVI as a proxy to estimate the CO<sub>2</sub> fluxes in peatlands: example of alkaline  
743 fen, The 16th International Peatland Congress: Peatland and Peat - Source of Ecosystem Services, Tallinn,  
744 Estonia,
- 745 Pinheiro, J. C. and Bates, D. M.: Fitting Linear Mixed-Effects Models, in: Mixed-Effects Models in S  
746 and S-PLUS, edited by: Pinheiro, J. C., and Bates, D. M., Springer New York, New York, NY, 133-199,  
747 10.1007/0-387-22747-4\_4, 2000.
- 748 Prananto, J. A., Minasny, B., Comeau, L.-P., Rudiyanto, R., and Grace, P.: Drainage increases CO<sub>2</sub> and  
749 N<sub>2</sub>O emissions from tropical peat soils, Global Change Biology, 26, 4583-4600,  
750 <https://doi.org/10.1111/gcb.15147>, 2020.
- 751 Rey-Sanchez, C., Arias-Ortiz, A., Kasak, K., Chu, H., Szutu, D., Verfaillie, J., and Baldocchi, D.:  
752 Detecting Hot Spots of Methane Flux Using Footprint-Weighted Flux Maps, Journal of geophysical  
753 research. Biogeosciences, 127, e2022JG006977, 10.1029/2022jg006977, 2022.
- 754 Rhoswen, L., Rhoswen, L., Nicholas, K., Nicholas, K., Devito, K. J., Kevin, J. D., Kevin, D., Richard,  
755 M. P., Richard, M. P., Carl, M., Carl, A. M., Waddington, J. M., James, M. W., Stefan, K., and Stefan, K.:  
756 Disturbance Impacts on Thermal Hot Spots and Hot Moments at the Peatland-Atmosphere Interface,  
757 Geophysical Research Letters, 10.1002/2017gl075974, 2018.
- 758 Risk, D., Nickerson, N., Creelman, C., McArthur, G., and Owens, J.: Forced Diffusion soil flux: A new  
759 technique for continuous monitoring of soil gas efflux, Agricultural and Forest Meteorology, 151, 1622-  
760 1631, <https://doi.org/10.1016/j.agrformet.2011.06.020>, 2011.
- 761 Rowson, J., Worrall, F., Evans, M., and Dixon, S.: Predicting soil respiration from peatlands, Science of  
762 The Total Environment, 442C, 397-404, 10.1016/j.scitotenv.2012.10.021, 2012.
- 763 Schubert, P., Eklundh, L., Lund, M., and Nilsson, M.: Estimating northern peatland CO<sub>2</sub> exchange from  
764 MODIS time series data, Remote Sensing of Environment, 114, 1178-1189,  
765 <https://doi.org/10.1016/j.rse.2010.01.005>, 2010.
- 766 Shrout, P. E. and Fleiss, J. L.: Intraclass correlations: Uses in assessing rater reliability, Psychological  
767 Bulletin, 86, 420-428, 10.1037/0033-2909.86.2.420, 1979.
- 768 Simpson, G.: Drivers of peatland CO<sub>2</sub> balance: a fusion of UAV remote sensing and micrometeorology,  
769 Doctoral dissertation, School of GeoSciences, The University of Edinburgh, U.K., 57-157 pp.,



- 770 <http://dx.doi.org/10.7488/era/3228>, 2023.
- 771 Sougnez, N. and Vanacker, V.: The topographic signature of Quaternary tectonic uplift in the Ardennes  
772 massif (Western Europe), Hydrol. Earth Syst. Sci., 15, 1095-1107, [https://doi.org/10.5194/hess-15-1095-](https://doi.org/10.5194/hess-15-1095-2011)  
773 [2011](https://doi.org/10.5194/hess-15-1095-2011), 2011.
- 774 Steenvoorden, J., Bartholomeus, H., and Limpens, J.: Less is more: Optimizing vegetation mapping in  
775 peatlands using unmanned aerial vehicles (UAVs), International Journal of Applied Earth Observation  
776 and Geoinformation, 117, 103220, <https://doi.org/10.1016/j.jag.2023.103220>, 2023.
- 777 Stoy, P. C., Street, L. E., Johnson, A. V., Prieto-Blanco, A., and Ewing, S. A.: Temperature, Heat Flux,  
778 and Reflectance of Common Subarctic Mosses and Lichens under Field Conditions: Might Changes to  
779 Community Composition Impact Climate-Relevant Surface Fluxes?, Arctic, Antarctic, and Alpine  
780 Research, 44, 500-508, 10.1657/1938-4246-44.4.500, 2012.
- 781 Swails, E. E., Ardón, M., Krauss, K. W., Peralta, A. L., Emanuel, R. E., Helton, A. M., Morse, J. L.,  
782 Gutenberg, L., Cormier, N., Shoch, D., Settlemyer, S., Soderholm, E., Boutin, B. P., Peoples, C., and  
783 Ward, S.: Response of soil respiration to changes in soil temperature and water table level in drained and  
784 restored peatlands of the southeastern United States, Carbon Balance and Management, 17, 18,  
785 10.1186/s13021-022-00219-5, 2022.
- 786 Treat, C. C., Wollheim, W. M., Varner, R. K., Grandy, A. S., Talbot, J., and Froelking, S.: Temperature and  
787 peat type control CO<sub>2</sub> and CH<sub>4</sub> production in Alaskan permafrost peats, Global Change Biology, 20,  
788 2674-2686, 10.1111/gcb.12572, 2014.
- 789 Turetsky, M. R., Benscoter, B., Page, S., Rein, G., van der Werf, G. R., and Watts, A.: Global vulnerability  
790 of peatlands to fire and carbon loss, Nature Geoscience, 8, 11-14, 10.1038/ngeo2325, 2015.
- 791 UNEP: Global Peatlands Assessment – The State of the World’s Peatlands: Evidence for action toward  
792 the conservation, restoration, and sustainable management of peatlands, Global Peatlands Initiative,  
793 United Nations Environment Programme9789280739916, 125-154,  
794 <https://doi.org/10.59117/20.500.11822/41222>, 2022.
- 795 van Giersbergen, Q., Barthelmes, A., Couwenberg, j., Fritz, C., Lång, K., Martin, N., and Tanneberger,  
796 F.: Identifying hotspots of greenhouse gas emissions from drained peatlands in the European Union,  
797 PREPRINT (Version 1) available at Research Square, <https://doi.org/10.21203/rs.3.rs-4629642/v1>, 2024.
- 798 Walcker, R., Le Lay, C., Gandois, L., Elger, A., and Jassey, V. E. J.: High-resolution mapping of peatland



799 CO<sub>2</sub> fluxes using drone multispectral images, *Ecological Informatics*, 103060,  
800 <https://doi.org/10.1016/j.ecoinf.2025.103060>, 2025.

801 Walker, T. N., Garnett, M. H., Ward, S. E., Oakley, S., Bardgett, R. D., and Ostle, N. J.: Vascular plants  
802 promote ancient peatland carbon loss with climate warming, *Global Change Biology*, 22, 1880-1889,  
803 <https://doi.org/10.1111/gcb.13213>, 2016.

804 Wang, H., Richardson, C. J., and Ho, M.: Dual controls on carbon loss during drought in peatlands,  
805 *Nature Climate Change*, 5, 584-587, 10.1038/NCLIMATE2643, 2015a.

806 Wang, H., Tian, J., Chen, H., Ho, M., Vilgalys, R., Bu, Z.-J., Liu, X., and Richardson, C. J.: Vegetation  
807 and microbes interact to preserve carbon in many wooded peatlands, *Communications Earth &*  
808 *Environment*, 2, 67, 10.1038/s43247-021-00136-4, 2021.

809 Wang, M., Moore, T. R., Talbot, J., and Riley, J. L.: The stoichiometry of carbon and nutrients in peat  
810 formation, *Global Biogeochemical Cycles*, 29, 113-121, <https://doi.org/10.1002/2014GB005000>, 2015b.

811 Wangari, E. G., Mwangada Mwanake, R., Houska, T., Kraus, D., Gettel, G. M., Kiese, R., Breuer, L.,  
812 and Butterbach-Bahl, K.: Identifying landscape hot and cold spots of soil greenhouse gas fluxes by  
813 combining field measurements and remote sensing data, *Biogeosciences*, 20, 5029-5067, 10.5194/bg-20-  
814 5029-2023, 2023.

815 Wangari, E. G., Mwanake, R. M., Kraus, D., Werner, C., Gettel, G. M., Kiese, R., Breuer, L., Butterbach-  
816 Bahl, K., and Houska, T.: Number of Chamber Measurement Locations for Accurate Quantification of  
817 Landscape-Scale Greenhouse Gas Fluxes: Importance of Land Use, Seasonality, and Greenhouse Gas  
818 Type, *Journal of Geophysical Research: Biogeosciences*, 127, e2022JG006901,  
819 <https://doi.org/10.1029/2022JG006901>, 2022.

820 Webster, K. L., Creed, I. F., Beall, F. D., and Bourbonnière, R. A.: Sensitivity of catchment-aggregated  
821 estimates of soil carbon dioxide efflux to topography under different climatic conditions, *Journal of*  
822 *Geophysical Research: Biogeosciences*, 113, <https://doi.org/10.1029/2008JG000707>, 2008.

823 Wilkinson, S. L., Andersen, R., Moore, P. A., Davidson, S. J., Granath, G., and Waddington, J. M.:  
824 Wildfire and degradation accelerate northern peatland carbon release, *Nature Climate Change*, 13, 456-  
825 461, <https://doi.org/10.1038/s41558-023-01657-w>, 2023.

826 Wilson, D., Dixon, S. D., Artz, R. R. E., Smith, T. E. L., Evans, C. D., Owen, H. J. F., Archer, E., and  
827 Renou-Wilson, F.: Derivation of greenhouse gas emission factors for peatlands managed for extraction



828 in the Republic of Ireland and the United Kingdom, *Biogeosciences*, 12, 5291-5308, 10.5194/bg-12-  
829 5291-2015, 2015.

830 Wright, E. L., Black, C. R., Turner, B. L., and Sjögersten, S.: Environmental controls of temporal and  
831 spatial variability in and fluxes in a neotropical peatland, *Global Change Biology*, 19, 3775-3789,  
832 <https://doi.org/10.1111/gcb.12330>, 2013.

833 Wutzler, T., Perez-Priego, O., Morris, K., El-Madany, T. S., and Migliavacca, M.: Soil CO<sub>2</sub> efflux errors  
834 are lognormally distributed – implications and guidance, *Geosci. Instrum. Method. Data Syst.*, 9, 239-  
835 254, 10.5194/gi-9-239-2020, 2020.

836 Xu, J., Morris, P. J., Liu, J., and Holden, J.: PEATMAP: Refining estimates of global peatland distribution  
837 based on a meta-analysis, *CATENA*, 160, 134-140, <https://doi.org/10.1016/j.catena.2017.09.010>, 2018.

838 Yu, Z., Loisel, J., Brosseau, D. P., Beilman, D. W., and Hunt, S. J.: Global peatland dynamics since the  
839 Last Glacial Maximum, *Geophysical Research Letters*, 37, <https://doi.org/10.1029/2010GL043584>, 2010.

840 Zhang, C., Comas, X., and Brodylo, D.: A Remote Sensing Technique to Upscale Methane Emission  
841 Flux in a Subtropical Peatland, *Journal of Geophysical Research: Biogeosciences*, 125, e2020JG006002,  
842 <https://doi.org/10.1029/2020JG006002>, 2020.

843 Zou, J., Ziegler, A. D., Chen, D., McNicol, G., Ciais, P., Jiang, X., Zheng, C., Wu, J., Wu, J., Lin, Z., He,  
844 X., Brown, L. E., Holden, J., Zhang, Z., Ramchunder, S. J., Chen, A., and Zeng, Z.: Rewetting global  
845 wetlands effectively reduces major greenhouse gas emissions, *Nature Geoscience*, 15, 627-632,  
846 10.1038/s41561-022-00989-0, 2022.

847
